# Supplementary material
Source: publisher site journal article supplement (https://www.dovepress.com/article/597893)

**Supplemental Figure 1**: Inclusion of study population.


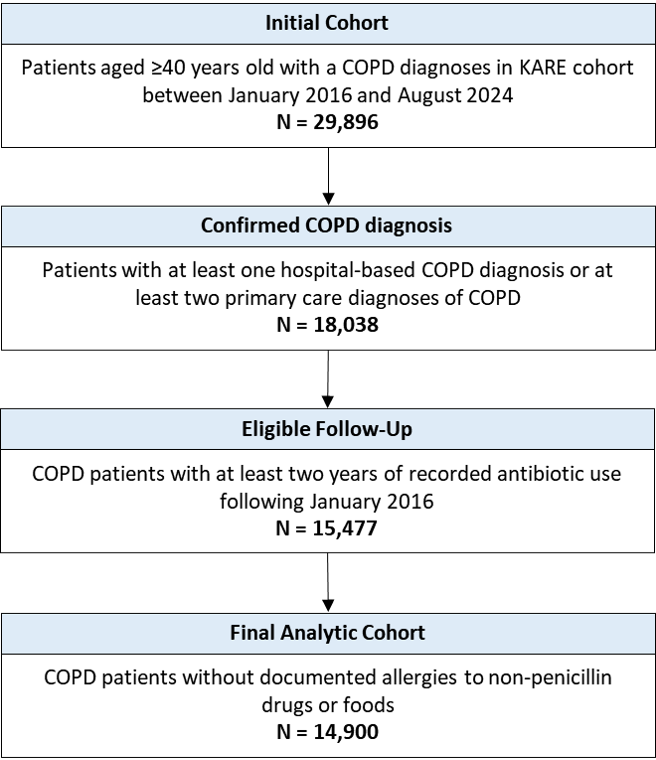

Supplement: Supplementary file 1 [file 597893%20Supplementary%20file.docx]
